# Supplementary material for: Presaccadic attention improves or impairs performance by enhancing sensitivity to higher spatial frequencies
Source: PubMed Central journal article supplement (PMC6389934; doi:10.1038/s41598-018-38262-3), 2019-02-25
Supplement: 41598_2018_38262_MOESM1_ESM.pdf [file 41598_2018_38262_MOESM1_ESM.pdf]

# **Presaccadic attention improves or impairs performance by enhancing sensitivity to higher spatial frequencies**

Hsin-Hung Li<sup>1</sup>, Jasmine Pan<sup>1</sup> and Marisa Carrasco<sup>1,2</sup>

<sup>1</sup> Department of Psychology, New York University, New York, New York, USA

<sup>2</sup> Center for Neural Science, New York University, New York, New York, USA

## Supplementary Information

Repeated Measures Two-Way Analysis of Variance Table

| Source                | <i>SS</i> | <i>df</i> | <i>MS</i> | <i>F</i> | <i>p</i> |
|-----------------------|-----------|-----------|-----------|----------|----------|
| Subjects              | 0.74      | 7         |           |          |          |
| Masking SF            | 5.57      | 2         | 2.79      | 10.29    | 0.002    |
| Cue type              | 0.61      | 1         | 0.61      | 2.73     | 0.143    |
| Masking SF x Cue type | 1.18      | 2         | 0.59      | 6.53     | 0.009    |
| Error                 | 6.62      | 35        | 0.19      |          |          |
| Total                 | 14.72     | 47        |           |          |          |

Table S1. Experiment 1a. Presaccadic attention (constant SF target and different SF masks)

Repeated Measures Two-Way Analysis of Variance Table

| Source                | <i>SS</i> | <i>df</i> | <i>MS</i> | <i>F</i> | <i>p</i> |
|-----------------------|-----------|-----------|-----------|----------|----------|
| Subjects              | 2.79      | 7         |           |          |          |
| Masking SF            | 10.28     | 2         | 5.14      | 32.76    | 0.001    |
| Cue type              | 0.01      | 1         | 0.01      | 0.12     | 0.742    |
| Masking SF x Cue type | 0.18      | 2         | 0.04      | 2.35     | 0.132    |
| Error                 | 3.02      | 35        | 0.09      |          |          |
| Total                 | 16.27     | 47        |           |          |          |

Table S2. Experiment 1b. Covert attention (constant SF target and different SF masks)

Repeated Measures Three-Way Analysis of Variance Table

| Source                                    | <i>SS</i> | <i>df</i> | <i>MS</i> | <i>F</i> | <i>p</i> |
|-------------------------------------------|-----------|-----------|-----------|----------|----------|
| Subjects                                  | 2.50      | 6         |           |          |          |
| Masking SF                                | 10.25     | 2         | 5.12      | 26.86    | 0.000    |
| Cue type                                  | 0.00      | 1         | 0.00      | 0.01     | 0.935    |
| Attention type                            | 0.47      | 1         | 0.47      | 2.72     | 0.150    |
| Masking SF x Cue type                     | 0.45      | 2         | 0.23      | 9.53     | 0.003    |
| Masking SF x Attention type               | 1.16      | 2         | 0.58      | 6.62     | 0.012    |
| Cue type x Attention type                 | 0.01      | 1         | 0.01      | 0.02     | 0.904    |
| Masking SF x Cue type x<br>Attention type | 1.75      | 2         | 0.88      | 16.02    | 0.000    |
| Error                                     | 6.10      | 66        |           |          |          |
| Total                                     | 22.70     | 83        |           |          |          |

Table S3. Experiment 1. Presaccadic attention versus covert attention (constant SF target and different SF masks)

Repeated Measures Two-Way Analysis of Variance Table

| Source                | <i>SS</i> | <i>df</i> | <i>MS</i> | <i>F</i> | <i>p</i> |
|-----------------------|-----------|-----------|-----------|----------|----------|
| Subjects              | 9.28      | 8         |           |          |          |
| Masking SF            | 12.52     | 1         | 12.52     | 101.05   | 0.000    |
| Cue type              | 0.35      | 1         | 0.35      | 1.32     | 0.285    |
| Masking SF x Cue type | 2.16      | 1         | 2.16      | 33.86    | 0.000    |
| Error                 | 3.62      | 24        | 0.15      |          |          |
| Total                 | 27.93     | 35        |           |          |          |

Table S4. Experiment 2. Presaccadic attention (different SF targets and constant SF mask).
